# Supplementary material for: Body mass index and clinical outcomes in patients with intracerebral haemorrhage: results from the China Stroke Center Alliance
Source: PubMed Central journal article supplement — Stroke Vasc Neurol. 2021 Feb 1;6(3):424–32. doi: 10.1136/svn-2020-000534 (PMC8485243; doi:10.1136/svn-2020-000534), 2021-02-01
Supplement: svn-2020-000534supp001.pdf [file svn-2020-000534supp001.pdf]

**Supplementary Table 1. Subgroup analysis of outcomes in patients with ICH who underwent hematoma evacuation**

| Outcomes                       | Events, n (%) | Unadjusted         |         | Adjusted*          |         |
|--------------------------------|---------------|--------------------|---------|--------------------|---------|
|                                |               | OR (95%CI)         | P value | OR (95%CI)         | P value |
| <b>In-hospital mortality</b>   |               |                    |         |                    |         |
| Underweight                    | 11(5.5)       | 1.119(0.595-2.104) | 0.728   | 0.621(0.102-3.785) | 0.606   |
| Normal weight                  | 137(4.9)      | Ref                | NA      | Ref                | NA      |
| Overweight                     | 120(4.6)      | 0.925(0.720-1.189) | 0.542   | 0.730(0.402-1.328) | 0.303   |
| Obese                          | 172(5.9)      | 1.218(0.967-1.534) | 0.094   | 0.860(0.489-1.515) | 0.603   |
| <b>Non-routine disposition</b> |               |                    |         |                    |         |
| Underweight                    | 26(12.9)      | 0.846(0.553-1.294) | 0.440   | 0.608(0.244-1.513) | 0.285   |
| Normal weight                  | 416(14.9)     | Ref                | NA      | Ref                | NA      |
| Overweight                     | 392(14.9)     | 0.998(0.860-1.160) | 0.984   | 0.884(0.664-1.177) | 0.399   |
| Obese                          | 480(16.5)     | 1.129(0.978-1.302) | 0.097   | 1.057(0.804-1.391) | 0.689   |

NA = not applicable; Ref = Reference.

\*Adjusted variables included age, sex, level of education, health insurance, admission time period, Pre-stroke mRS, GCS, current smoking, drinking, previous hypertension, diabetes, dyslipidemia, atrial fibrillation, TIA, ischemic stroke, ICH, heart failure, myocardial infarction, PVD, antiplatelet drug, anticoagulation drug, antihypertensive drug, antidiabetic drug, LDL, FBG, Glycated hemoglobin, Hcy, BUN, UA, and platelets.

**Supplementary Table 2. Sensitive analysis of outcomes in patients with ICH according to WHO obesity criteria**

| Outcomes                          | Percentage of Patients Affected, n (%) | Regression Model   |        |                    |       |
|-----------------------------------|----------------------------------------|--------------------|--------|--------------------|-------|
|                                   |                                        | Unadjusted         |        | Adjusted*          |       |
|                                   |                                        | OR (95%CI)         | P      | OR (95%CI)         | P     |
| <b>In-hospital mortality rate</b> |                                        |                    |        |                    |       |
| Underweight                       | 108(3.5)                               | 1.588(1.300-1.939) | <.0001 | 1.688(1.136-2.510) | 0.010 |
| Normal weight                     | 1238(2.2)                              | Ref                | NA     |                    |       |
| Overweight                        | 514(2.4)                               | 1.073(0.967-1.191) | 0.184  | 1.100(0.910-1.331) | 0.324 |
| Obese                             | 83(2.8)                                | 1.280(1.021-1.603) | 0.032  | 1.288(0.838-1.980) | 0.248 |
| <b>Non-routine disposition</b>    |                                        |                    |        |                    |       |
| Underweight                       | 225(7.3)                               | 0.870(0.757-1.000) | 0.050  | 1.106(0.888-1.378) | 0.369 |
| Normal weight                     | 4596(8.3)                              |                    |        |                    |       |
| Overweight                        | 1939(9.0)                              | 1.097(1.038-1.160) | 0.001  | 0.960(0.875-1.052) | 0.382 |
| Obese                             | 296(10.1)                              | 1.247(1.101-1.411) | 0.001  | 1.140(0.926-1.403) | 0.217 |

\*Adjusted variables included age, sex, education, health insurance, admission time period, Pre-stroke mRS, GCS, current smoking, drinking, previous hypertension, diabetes, dyslipidemia, atrial fibrillation, TIA, ischemic stroke, ICH, heart failure, myocardial infarction, PVD, antiplatelet drug, anticoagulation drug, antihypertensive drug, antidiabetic drug, LDL, FBG, Glycated hemoglobin, Hcy, BUN, UA, platelets, and hematoma evacuation
